# Supplementary material
Source: publisher figshare collection journal article supplement (https://acs.figshare.com/ndownloader/files/4072468)
Supplement: Supplementary file 1 [file 4072468]

# **Dehydration-induced Amorphous Phases of Calcium Carbonate: A Molecular Dynamics Study**

Moumita Saharay<sup>1,\*</sup>, A. Ozgur Yazaydin<sup>2</sup>, R. James Kirkpatrick<sup>3</sup>

<sup>1</sup> Department of Chemistry, Michigan State University, East Lansing, Michigan 48824, USA

<sup>2</sup> Department of Chemical Engineering, University of Surrey, Guildford, GU2 7XH, United Kingdom

<sup>3</sup> College of Natural Science, Michigan State University, East Lansing, Michigan 48824, USA

\*To whom correspondence should be addressed. E-mail: saharaym@msu.edu;

Tel.: +1 (517) 355-9715 ext 336. Fax: +1 (517) 432-1054

**Modeling of a second ACC with a  $\text{H}_2\text{O}/\text{CaCO}_3$  ratio of 1.0 begun with a different initial configuration.**

To test the convergence of our S1.0 model to an equilibrium structure, we undertook a second simulation of ACC with a  $\text{H}_2\text{O}/\text{CaCO}_3$  ratio of 1.0 but with a very different starting configuration. The steps involved in generating this system (R1.0) were the following,

- A cluster consisting of one formula unit of  $\text{CaCO}_3$  and one water molecule was geometry optimized using the Gaussian03 [1] package with B3LYP exchange correlation.
- This optimized cluster was then repeated 1620 times in an orthorhombic box of  $65.0 \times 55.4 \times 73.0 \text{ \AA}^3$  to have the similar composition to S1.0 (Supplementary Figure 1a)
- This system was then modeled with NPT molecular dynamics simulations at 300K for 2 ns. The snapshot of the equilibrated system shown in Supplementary Figure 1b visually illustrates the disordering of the system that occurred during the simulation.
- The final equilibrium box dimension was  $50.0 \times 43.0 \times 56.1 \text{ \AA}^3$ .

The  $\text{Ca-O}_C$  and  $\text{Ca-Ca}$  radial distribution functions shown in Supplementary Figure 2 demonstrate that the structures beginning from the Singer *et al.* [2] model (S1.0) and R1.0 are essentially identical.

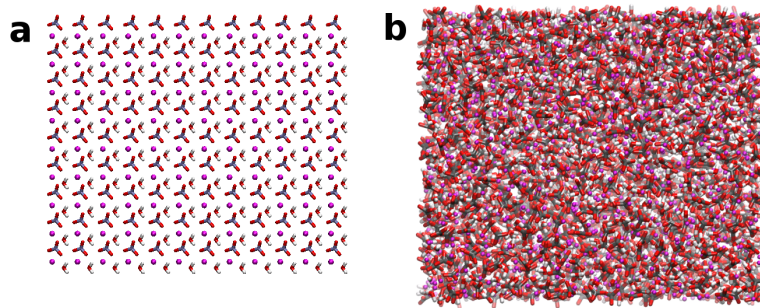

Figure S1: (a) Initial configuration of a simulation cell of ACC with  $\text{H}_2\text{O}/\text{CaCO}_3 = 1.0$ . (b) Final amorphous structure of this configuration after 5ns of MD simulation. Color scheme: Oxygen in red, Carbon in gray, Calcium in magenta, Hydrogen in white.

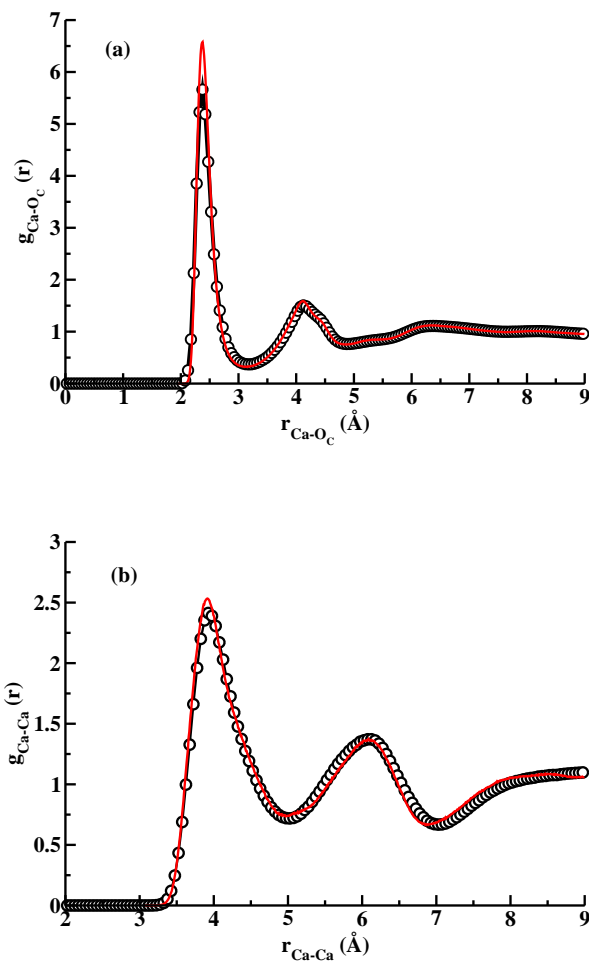

Figure S2: Intermolecular radial distribution functions between (a) Ca-O<sub>C</sub>, and (b) Ca-Ca in R1.0 (black open circle), and S1.0 (red).

## References

- [1] Frisch, M. J. *et al.* Gaussian 03, Revision C.02. Gaussian, Inc., Wallingford, CT, 2004.
- [2] Singer, J. W.; Yazaydin, A. O.; Kirkpatrick, R. J.; Bowers, G. Structure and Transformation of Amorphous Calcium Carbonate: a Solid-State  $^{43}\text{Ca}$  NMR and Computational Molecular Dynamics Investigation. *Chem. Mater.* **2012**, *24*, 1828-1836.
